# Supplementary material for: Quantification of Phytochelatins in Chlamydomonas reinhardtii using ferrocene-based derivatization
Source: Royal Society of Chemistry journal article supplement (doi:10.1039/c005014h), 2010-01-01
Supplement: c005014h.pdf [file c005014h.pdf]

## Supporting Information

### Quantification of Phytochelatins in *Chlamydomonas reinhardtii*

#### 5 using ferrocene-based derivatization

Anja Bräutigam<sup>1</sup>, Susanne Bomke<sup>2</sup>, Thorben Pfeifer<sup>2</sup>, Uwe Karst<sup>2</sup>, Gerd-Joachim Krauss<sup>1</sup>, Dirk Wesenberg<sup>1\*</sup>

10 <sup>1</sup>Martin-Luther-Universität Halle-Wittenberg, Institut für Biochemie und Biotechnologie, Ökologische und Pflanzen-Biochemie, Kurt-Mothes-Straße 3, 06120 Halle (Saale), Germany

\*To whom correspondence should be addressed. E-mail: [dirk.wesenberg@biochemtech.uni-halle.de](mailto:dirk.wesenberg@biochemtech.uni-halle.de); Fax: +49 (0) 3455527012

15 <sup>2</sup>Westfälische Wilhelms-Universität Münster, Institut für Anorganische und Analytische Chemie, Corrensstrasse 30, 48149, Münster, Germany

#### Content

- 20 Figure S-1 ICP-MS signal of <sup>56</sup>Fe (bold line) fed continually via sheath flow (366 ppm), injection of 10 µL solvent A; 2<sup>nd</sup> axis shows the LC gradient course (fine line).
- 25 Table S-1 Measured and calculated exact masses of phytochelatins via LC/ESI-ToF-MS in a *C. reinhardtii* sample incubated 48 h with Cd.
- Table S-2 Concentrations of Fe, Cu and Zn in the TAP culture medium determined by ICP-OES. Standard deviation (SD) and Relative Standard Deviation (RSD) are calculated of three individual measurements (n = 3).
- 30

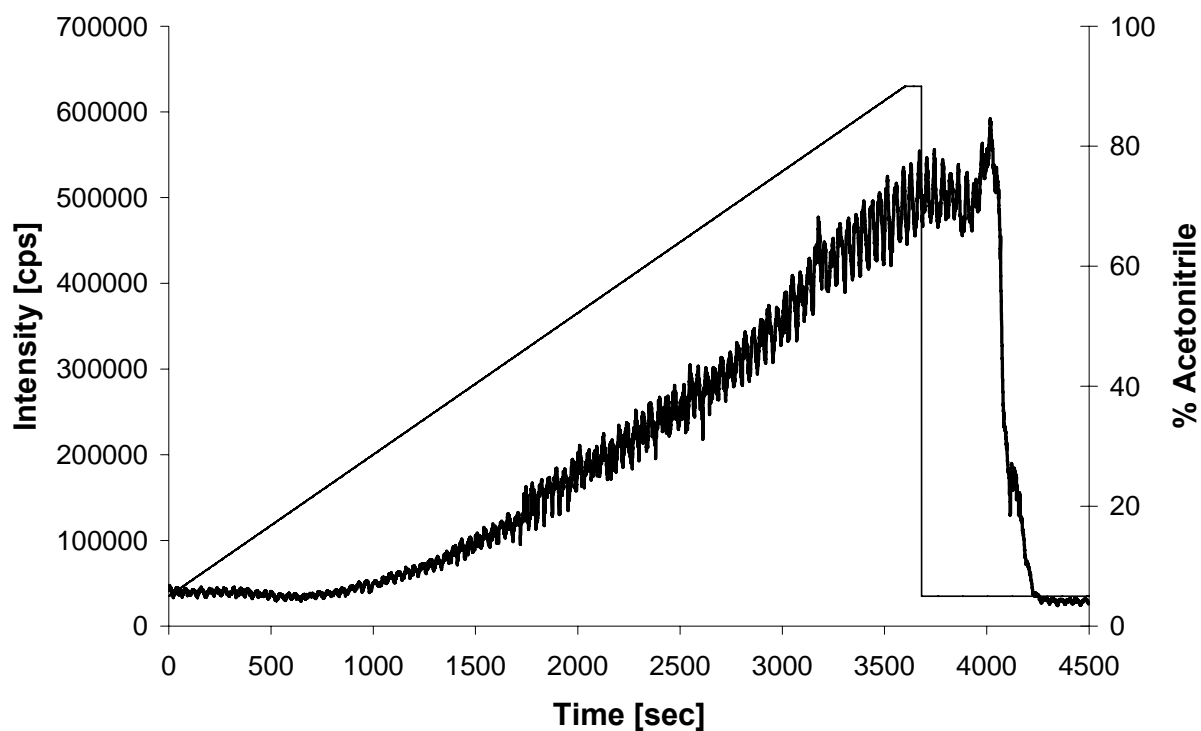

**Figure S-1** ICP-MS signal of <sup>56</sup>Fe (bold line) fed continually via sheath flow (366 ppm, 0.66 mL/h), injection of 10  $\mu$ L solvent A; 2<sup>nd</sup> axis shows the LC gradient course (fine line).

5

10

| Thiol                                             | Retention time<br>[min] | <i>m/z</i><br>calculated | <i>m/z</i><br>measured | $\Delta$ ppm | Number of<br>FMEA-tags | charge               |
|---------------------------------------------------|-------------------------|--------------------------|------------------------|--------------|------------------------|----------------------|
| TCEP-FMEA                                         | 13.74                   | 603.116                  | 603.1189               | -4.70        | 1                      | [M+H] <sup>+</sup>   |
| Cysteine                                          | 13.99                   | 474.0762                 | 474.0781               | -4.04        | 1                      | [M+H] <sup>+</sup>   |
| GSH                                               | 15.10                   | 660.1420                 | 660.1427               | -0.94        | 1                      | [M+H] <sup>+</sup>   |
| PC <sub>3</sub> desGly/<br>CysPC <sub>2</sub> Glu | 18.21                   | 886.1624                 | 886.1673               | -5.54        | 3                      | [M+2H] <sup>2+</sup> |
| CysPC <sub>2</sub> desGly                         | 18.97                   | 821.6460                 | n. d.                  |              |                        | [M+2H] <sup>2+</sup> |
| CysGSHGlu/<br>PC <sub>2</sub> desGly              | 21.79                   | 1187.2149                | 1187.2239              | -7.63        | 2                      | [M+H] <sup>+</sup>   |
| CysGsH                                            | 21.95                   | 1115.1942                | 1115.2023              | -7.30        | 2                      | [M+H] <sup>+</sup>   |
| CysGSHdesGly                                      | 22.55                   | 1058.1809                | 1058.1814              | -0.45        | 2                      | [M+H] <sup>+</sup>   |
| PC <sub>2</sub>                                   | 23.45                   | 1244.2348                | 1244.2455              | -8.50        | 2                      | [M+H] <sup>+</sup>   |
| CysPC <sub>2</sub>                                | 26.36                   | 850.1476                 | 850.1567               | -10.80       | 3                      | [M+2H] <sup>2+</sup> |
| PC <sub>3</sub>                                   | 27.77                   | 914.1786                 | 914.1741               | +4.93        | 3                      | [M+2H] <sup>2+</sup> |
| CysPC <sub>3</sub>                                | 29.19                   | 1142.2097                | 1142.2081              | +1.35        | 4                      | [M+2H] <sup>2+</sup> |
| PC <sub>2</sub> Ala                               | 29.29                   | 1258.2627                | 1258.2611              | +1.31        | 2                      | [M+H] <sup>+</sup>   |
| PC <sub>4</sub>                                   | 30.69                   | 1206.724                 | 1206.7294              | -4.38        | 4                      | [M+2H] <sup>2+</sup> |
| CysPC <sub>4</sub>                                | 31.56                   | 1434.2483                | 1434.2595              | -7.80        | 5                      | [M+2H] <sup>2+</sup> |

**Table S-1:** Measured and calculated exact masses of phytochelatins via LC/ESI-ToF-MS in a *C. reinhardtii* sample incubated 48 h with Cd.

| Element | c [ $\mu\text{g/L}$ ] | SD [ $\mu\text{g/L}$ ] | RSD [%] |
|---------|-----------------------|------------------------|---------|
| Fe      | 264.24                | 0.55                   | 0.21    |
| Cu      | 488.35                | 1.23                   | 0.25    |
| Zn      | 5.93                  | 0.04                   | 0.75    |

5 **Table S-2:** Concentrations of Fe, Cu and Zn in the TAP culture medium determined by ICP-OES. Standard deviation (SD) and Relative Standard Deviation (RSD) are calculated of three individual measurements ( $n = 3$ ).
